# Supplementary material for: Molecular characterization and investigation of the role of genetic variation in phenotypic variability and response to treatment in a large pediatric Marfan syndrome cohort
Source: PubMed Central journal article supplement — Genet Med. Author manuscript; Available in PMC 2023 May 1. (PMC9680912; doi:10.1016/j.gim.2021.12.015), 2022-01-17
Supplement: NIHMS1850106-supplement-Supplemental_Materials.pdf [file NIHMS1850106-supplement-Supplemental_Materials.pdf]

## SUPPLEMENTAL MATERIAL

### **Molecular characterization and investigation of the role of genetic variation in phenotypic variability and response to treatment in a large pediatric Marfan syndrome cohort**

Josephina A.N. Meester, PhD<sup>1</sup>, Silke Peeters, PhD<sup>1</sup>, Lotte Van Den Heuvel, MSc<sup>1</sup>, Geert Vandeweyer, PhD<sup>1</sup>, Erik Fransen, PhD<sup>1,2</sup>, Elizabeth Cappella, MSc<sup>3</sup>, Harry C. Dietz, MD<sup>4,5</sup>, Geoffrey Forbus, MD<sup>6</sup>, Bruce D. Gelb, MD<sup>7</sup>, Elizabeth Goldmuntz, MD<sup>8,9</sup>, Arvind Hoskoppal, MD<sup>10</sup>, Andrew P. Landstrom, MD, PhD<sup>11</sup>, Teresa Lee, MD<sup>12</sup>, Seema Mital, MD<sup>13</sup>, Shaine Morris, MD<sup>14</sup>, Aaron K. Olson, MD<sup>15</sup>, Marjolijn Renard, PhD<sup>16</sup>, Dan M. Roden, MD<sup>17</sup>, Michael N. Singh, MD<sup>18</sup>, Elif Seda Selamet Tierney, MD<sup>19</sup>, Justin T. Tretter, MD<sup>20</sup>, Sara L. Van Driest, MD, PhD<sup>17</sup>, Marcia Willing, MD<sup>21</sup>, Aline Verstraeten, PhD<sup>1</sup>, Lut Van Laer, PhD<sup>1</sup>, Ronald V. Lacro, MD<sup>18</sup>, and Bart L. Loeys, MD, PhD<sup>1,22</sup>

<sup>1</sup>Center of Medical Genetics, Faculty of Medicine and Health Sciences, University of Antwerp and Antwerp University Hospital, Antwerp, Belgium

<sup>2</sup>StatUa Center for Statistics, University of Antwerp, Antwerp, Belgium

<sup>3</sup>Ann and Robert H. Lurie Children's Hospital, Chicago, IL

<sup>4</sup>McKusick-Nathans Institute of Genetic Medicine, Johns Hopkins School of Medicine, The Johns Hopkins University, Baltimore, MD

<sup>5</sup>Howard Hughes Medical Institute, Baltimore, MD

<sup>6</sup>Department of Pediatrics, Division of Pediatric Cardiology, Medical University of South Carolina, Charleston, SC

<sup>7</sup>Mindich Child Health and Development Institute, Departments of Pediatrics and Genetics & Genomic Sciences, Icahn School of Medicine at Mount Sinai, New York, NY

<sup>8</sup>Division of Cardiology, Children's Hospital of Philadelphia, Philadelphia, PA

<sup>9</sup>Department of Pediatrics, University of Pennsylvania Perelman School of Medicine, Philadelphia, PA

<sup>10</sup>Departments of Pediatrics and Internal Medicine, University of Utah and Intermountain Healthcare, Salt Lake City, UT

<sup>11</sup>Department of Pediatrics, Duke University School of Medicine, Durham, NC

<sup>12</sup>Children's Hospital of New York, New York City, NY

<sup>13</sup>Department of Pediatrics, Division of Cardiology, Hospital for Sick Children, University of Toronto, Toronto, Ontario, Canada

<sup>14</sup>Division of Cardiology, Department of Pediatrics, Baylor College of Medicine and Texas Children's Hospital, Houston, TX

<sup>15</sup>Department of Pediatrics, Seattle Children's Hospital, Seattle, WA

<sup>16</sup>Center for Medical Genetics Ghent, Department of Biomolecular Medicine, Ghent University, Ghent, Belgium

<sup>17</sup>Department of Medicine, Vanderbilt University Medical Center, Nashville, TN

<sup>18</sup>Department of Cardiology, Boston Children's Hospital and Department of Pediatrics, Harvard Medical School, Boston, MA

<sup>19</sup>Department of Paediatrics, Stanford University, Palo Alto, CA

<sup>20</sup>Heart Institute, Cincinnati Children's Hospital Medical Center, Cincinnati, OH

<sup>21</sup>Department of Pediatrics, Division of Genetics and Genomic Medicine, Washington University School of Medicine in St. Louis, St. Louis, MO

<sup>22</sup>Department of Human Genetics, Radboud University Medical Center, Nijmegen, The Netherlands

## **SUPPLEMENTAL CONTENT**

### **Supplemental Tables**

Supplemental Table 1A. Identified *FBNI* variants.

Supplemental Table 1B. Overview of non-*FBNI* genetic variants.

Supplemental Table 2. Genes included in (extended) TAAD panel

Supplemental Table 3. Modified ACMG/AMP criteria for variant classification.

Supplemental Table 4. Criteria used for HI and DN variant classification.

Supplemental Table 5. Clinical characteristics of TAAD panel-negative patients.

Supplemental Table 6. Clinical characteristics of the PHN trial cohort, stratified by inclusion in the genetics ancillary study cohort

Supplemental Table 7. Comparison of clinical characteristics of dominant-negative neonatal and non-neonatal cohort.

Supplemental Table 8. Number of patients with a dominant-negative variant per exon.

Supplemental Table 9. Comparison of clinical characteristics of atenolol and losartan cohort

### **Supplemental Figures**

Supplemental eFigure 1. Comparison of variant subtype distribution to literature.

Supplemental eFigure 2. Boxplots of aortic root z-score of patients with DN (likely) pathogenic variants according to exonic location.

## Supplemental Tables

### Supplemental Table 1A. Identified *FBN1* variants.

See separate excel file.

**Supplemental Table 1B. Overview of non-*FBN1* genetic variants.**

| Sample ID          | Gene                            | cDNA change <sup>a</sup>     | Protein change                    | Classification criteria | ACMG/AMP classification <sup>1</sup> | Previous <i>FBN1</i> testing |
|--------------------|---------------------------------|------------------------------|-----------------------------------|-------------------------|--------------------------------------|------------------------------|
| 354                | <i>ACTA2</i> ;<br><i>TGFBR2</i> | c.247G>A;<br>deletion exon 7 | p.(Asp83Asn);<br>deletion exon 7  | PM2, PP3; PM2,<br>PM4   | VUS; VUS                             | Negative                     |
| 355 <sup>b,e</sup> | <i>BGN</i>                      | c.5G>A                       | p.(Trp2*)                         | PM2, PVS1               | Likely<br>pathogenic (I)             | Unkown                       |
| 356 <sup>b,e</sup> | <i>BGN</i>                      | c.908A>C                     | p.(Gln303Pro)                     | PM2, PP5                | VUS                                  | Negative                     |
| 357                | <i>FLNA</i> ;<br><i>FLNA</i>    | c.3106C>T;<br>c.3127G>T      | p.(Arg1036Cys);<br>p.(Val1043Leu) | PM2, PP3; PP3           | VUS; VUS                             | Negative                     |
| 358                | <i>FLNA</i>                     | c.1041G>C                    | p.(Val347Ile)                     | PM2                     | VUS                                  | Unkown                       |
| 359                | <i>SMAD3</i>                    | c.1211T>C                    | p.(Leu404Ser)                     | PM2, PP3, PM1           | VUS                                  | Unkown                       |
| 360 <sup>c,d</sup> | <i>TGFBR2</i>                   | c.1411G>A                    | p.(Asp471Asn)                     | PM2, PS1, PM1,<br>PP1   | Likely<br>pathogenic (II)            | Unkown                       |
| 361 <sup>c,d</sup> | <i>TGFBR2</i>                   | c.1411G>A                    | p.(Asp471Asn)                     | PM2, PS1, PM1,<br>PP1   | Likely<br>pathogenic (II)            | Unkown                       |
| 362                | <i>TGFBR2</i>                   | c.1684C>T                    | p.(Arg562Cys)                     | PM2, PS1                | Likely<br>pathogenic (II)            | Unkown                       |
| 363                | <i>TGFBR2</i>                   | c.1091G>C                    | p.(Arg364Pro)                     | PM2, PP3, PM1           | VUS                                  | Unkown                       |

<sup>a</sup> GenBank reference sequence and version number for *ACTA2*: NM\_001141945.2; *BGN*: NM\_001711.6; *FLNA*: NM\_001110556.2; *SMAD3*: NM\_005902.4; *TGFBR2*: NM\_001024847.2; numbering is from +1 as A of the ATG initiation codon.

<sup>c</sup>, this sample has already been described in Baetens *et al.*, 2011.<sup>2</sup>

<sup>b</sup>, this sample has already been described in Proost *et al.*, 2014.<sup>3</sup>

<sup>d</sup>, this sample is related to one or two other individuals (with the same variant) in this cohort.

<sup>e</sup>, this sample has already been described in Meester *et al.*, 2014.<sup>4</sup>

Abbreviations: DN, dominant-negative; HI, haploinsufficient.

**Supplemental Table 2. Genes included in (extended) TAAD panel.**

| <b>Gene</b>          | <b>Reference</b>    |
|----------------------|---------------------|
| <u>ABL1</u>          | <u>NM_007313</u>    |
| <b>ACTA2</b>         | <b>NM_001141945</b> |
| <u>ARIH1</u>         | <u>NM_005744</u>    |
| <u>BGN</u>           | <u>NM_001711</u>    |
| <b>COL3A1</b>        | <b>NM_000090</b>    |
| <b>EFEMP2/FBLN4</b>  | <b>NM_016938</b>    |
| <u>ELN</u>           | <u>NM_001278939</u> |
| <u>EMILIN1</u>       | <u>NM_007046</u>    |
| <b>FBN1</b>          | <b>NM_000138</b>    |
| <u>FBN2</u>          | <u>NM_001999</u>    |
| <b>FLNA</b>          | <b>NM_001110556</b> |
| <u>FOXE3</u>         | <u>NM_012186</u>    |
| <u>HCN4</u>          | <u>NM_005477</u>    |
| <u>LMOD1</u>         | <u>NM_012134</u>    |
| <u>LOX</u>           | <u>NM_001178102</u> |
| <u>LTBP3</u>         | <u>NM_001130144</u> |
| <u>MAT2A</u>         | <u>NM_005911</u>    |
| <u>MFAP5</u>         | <u>NM_003480</u>    |
| <b>MYH11</b>         | <b>NM_001040113</b> |
|                      | <b>NM_001040114</b> |
| <b>MYLK</b>          | <b>NM_053025</b>    |
| <b>NOTCH1</b>        | <b>NM_017617</b>    |
| <u>PLOD1</u>         | <u>NM_000302</u>    |
| <u>PMEPA1/TMEPA1</u> | <u>NM_020182</u>    |
| <u>PRKG1</u>         | <u>NM_001098512</u> |
| <b>SKI</b>           | <b>NM_003036</b>    |
| <b>SLC2A10</b>       | <b>NM_030777</b>    |
| <u>SMAD2</u>         | <u>NM_001003652</u> |
| <b>SMAD3</b>         | <b>NM_005902</b>    |
|                      | <b>NM_001145103</b> |
| <u>SMAD4</u>         | <u>NM_005359</u>    |
| <u>SMAD6</u>         | <u>NM_005585</u>    |
| <b>TGFB2</b>         | <b>NM_001135599</b> |
| <u>TGFB3</u>         | <u>NM_003239</u>    |
| <b>TGFBR1</b>        | <b>NM_004612</b>    |
| <b>TGFBR2</b>        | <b>NM_001024847</b> |

**Bold:** genes included in the standard TAAD panel. Underlined: genes included in the extended TAAD panel.

**Supplemental Table 3. Modified ACMG/AMP criteria for variant classification.**  
See separate excel file.

**Supplemental Table 4. Criteria used for HI and DN variant classification.**

| <b>Dominant-negative variants</b>                                                                                                  | <b>Haploinsufficient variants</b>      |
|------------------------------------------------------------------------------------------------------------------------------------|----------------------------------------|
| Missense variants                                                                                                                  | Complete gene deletion                 |
| In-frame (exon) deletions/duplications                                                                                             | Deletion of first or last exon         |
| Premature terminaton codon (PTC) escaping nonsense mediated decay (NMD) based on standard predictive rules (e.g. PTC in last exon) | PTC with NMD                           |
| Splice variants with proven in-frame exon skipping                                                                                 | Frameshift                             |
|                                                                                                                                    | Splice variants with proven frameshift |

Abbreviations: DN, dominant-negative; HI, haploinsufficient.

**Supplemental Table 5. Clinical characteristics of TAAD panel-negative patients.**

| <b>Patient</b> | <b>Gender</b> | <b>Age (years)</b> | <b>Ectopia lentis</b> | <b>Aortic root diameter z-score</b> | <b>Number of major Ghent criteria</b> | <b><i>FBN1</i> variant previously identified</b> | <b>Family history (first degree relative)</b> |
|----------------|---------------|--------------------|-----------------------|-------------------------------------|---------------------------------------|--------------------------------------------------|-----------------------------------------------|
| 364            | Male          | 12.3               | No                    | 3.46                                | 2                                     | No                                               | No                                            |
| 365            | Female        | 20.0               | No                    | 3.22                                | 3                                     | Unknown                                          | Yes                                           |
| 366            | Male          | 18.1               | No                    | 2.52                                | 2                                     | No                                               | No                                            |
| 367            | Female        | 2.2                | No                    | 3.14                                | 2                                     | Unknown                                          | Yes                                           |
| 368            | Male          | 11.5               | Yes                   | 3                                   | 3                                     | Unknown                                          | No                                            |

Abbreviations: TAAD, Thoracic aortic aneurysm and dissection.



**Supplemental Table 6. Clinical characteristics of the PHN trial cohort, stratified by inclusion in the genetics ancillary study cohort.**

| Characteristic                           | Included in genetics ancillary study cohort (N=373) | Not included in genetics ancillary study cohort (N=235) | <i>P</i>  | <i>Q</i>  |
|------------------------------------------|-----------------------------------------------------|---------------------------------------------------------|-----------|-----------|
| Age ± SD (years)                         | 11.1±6.1                                            | 11.4±6.7                                                | .49       | .64       |
| No. (%) Male                             | 226 (61%)                                           | 140 (60%)                                               | .80       | .75       |
| No. (%) with Family history              | 199 (56%)                                           | 161 (71%)                                               | <.001     | .003      |
| No. (%) with Mitral valve prolapse       | 228 (62%)                                           | 140 (61%)                                               | .85       | .75       |
| No. (%) with Ectopia lentis              | 162 (48%)                                           | 93 (49%)                                                | .89       | .75       |
| No. (%) with Dural ectasia               | 22 (38%)                                            | 10 (27%)                                                | .27       | .46       |
| No. (%) with Striae                      | 146 (39%)                                           | 104 (45%)                                               | .14       | .35       |
| No. (%) with Pneumothorax                | 7 (2%)                                              | 10 (4%)                                                 | .08       | .25       |
| Aortic root diameter ± SD (z-score ± SD) | 3.4±.7 cm (4.3±1.2)                                 | 3.4±.8 cm (4.3±1.6)                                     | .74 (.72) | .75 (.75) |

Abbreviations: PHN, Pediatric Heart Network.

**Supplemental Table 7. Comparison of clinical characteristics of dominant-negative neonatal and non-neonatal cohort.**

| Characteristic                                       | Dominant-negative neonatal cohort <sup>a</sup> (N=33) | Non-neonatal <sup>a</sup> (N=265) | P            | Q            |
|------------------------------------------------------|-------------------------------------------------------|-----------------------------------|--------------|--------------|
| Age ± SD (years)                                     | 9.4±6.2                                               | 11.2±6.1                          | .10          | .28          |
| No. (%) with Ectopia lentis                          | 17 (57%)                                              | 111 (46%)                         | .28          | .46          |
| No. (%) with Highly arched palate                    | 30 (97%)                                              | 226 (86%)                         | .15          | .35          |
| No. (%) with Pulmonary artery diameter z-score > 2.0 | 3 (23%)                                               | 36 (28%)                          | >.99         | .79          |
| No. (%) with Dural ectasia                           | 4 (50%)                                               | 14 (33%)                          | .44          | .62          |
| No. (%) with Striae                                  | 7 (21%)                                               | 105 (40%)                         | .04          | .21          |
| No. (%) with Arachnodactyly                          | 26 (84%)                                              | 173 (66%)                         | .05          | .22          |
| No. (%) with Pes plani                               | 22 (73%)                                              | 188 (72%)                         | .88          | .75          |
| No. (%) with Pectus excavatum                        | 5 (15%)                                               | 76 (29%)                          | .10          | .28          |
| No. (%) with Pectus carinatum                        | 12 (36%)                                              | 115 (43%)                         | .45          | .62          |
| No. (%) with Scoliosis                               | 10 (32%)                                              | 73 (29%)                          | .66          | .75          |
| No. (%) with Joint hypermobility                     | 30 (94%)                                              | 213 (83%)                         | .11          | .28          |
| Aortic root diameter ± SD (z-score ± SD)             | 3.3±.7 cm (4.9±1.5)                                   | 3.4±.7 cm (4.2±1.1)               | .46<br>(.02) | .62<br>(.11) |
| Change in aortic root diameter z-score/year ± SD     | -.14±.28                                              | -.15±.24                          | .61          | .74          |

<sup>a</sup> The "neonatal" classification is purely based on the presence of a P/LP variant in exons 25-33 and is not based on any specific phenotypic features.

**Supplemental Table 8. Number of patients with a dominant-negative variant per exon.**

See separate excel file.

**Supplemental Table 9. Comparison of clinical characteristics of atenolol and losartan cohort.**

| Characteristic                                      | Atenolol cohort<br>(N=184)       |                               | Losartan cohort<br>(N=189)       |                                  | P            | Q            |
|-----------------------------------------------------|----------------------------------|-------------------------------|----------------------------------|----------------------------------|--------------|--------------|
| Age ± SD (years)                                    | 11.2±6.2                         |                               | 11.0±6.0                         |                                  | .78          | .75          |
| No. (%) Male                                        | 109 (59%)                        |                               | 117 (62%)                        |                                  | .60          | .74          |
| No. (%) with Family history                         | 79 (49%)                         |                               | 83 (51%)                         |                                  | .74          | .75          |
| No. (%) with Highly arched palate                   | 150 (83%)                        |                               | 166 (90%)                        |                                  | .06          | .22          |
| No. (%) with Mitral valve prolapse                  | 110 (60%)                        |                               | 116 (62%)                        |                                  | .70          | .75          |
| No. (%) with Pulmonary artery diameter z-score >2.0 | 29 (32%)                         |                               | 22 (24%)                         |                                  | .27          | .46          |
| No. (%) with Ectopia lentis                         | 81 (49%)                         |                               | 80 (47%)                         |                                  | .79          | .75          |
| No. (%) with Striae                                 | 71 (39%)                         |                               | 75 (40%)                         |                                  | .89          | .75          |
| No. (%) with Arachnodactyly                         | 122 (68%)                        |                               | 121 (65%)                        |                                  | .63          | .74          |
| No. (%) with Pes plani                              | 125 (70%)                        |                               | 138 (74%)                        |                                  | .35          | .54          |
| No. (%) with Pectus excavatum                       | 46 (25%)                         |                               | 54 (29%)                         |                                  | .44          | .62          |
| No. (%) with Pectus carinatum                       | 84 (46%)                         |                               | 77 (41%)                         |                                  | .34          | .53          |
| No. (%) with Scoliosis                              | 59 (34%)                         |                               | 46 (25%)                         |                                  | .09          | .28          |
| No. (%) with Joint hypermobility                    | 155 (87%)                        |                               | 151 (82%)                        |                                  | .19          | .39          |
| Aortic root diameter ± SD (z-score ± SD)            | 3.4±0.7cm (4.3±1.0)              |                               | 3.4±0.7 cm (4.4±1.3)             |                                  | .90<br>(.44) | .75<br>(.62) |
|                                                     | DN:<br>3.3±.7<br>cm<br>(4.2±1.0) | HI: 3.4±.7<br>cm<br>(4.2±1.0) | DN:<br>3.4±.7<br>cm<br>(4.5±1.4) | HI:<br>3.3±.7<br>cm<br>(4.2±1.1) | .95<br>(.24) | .77<br>(.46) |
| Change in aortic root diameter z-score/year ± SD    | -.19±.25                         |                               | -.14±.24                         |                                  | .06          | .22          |

**Supplemental Figures**

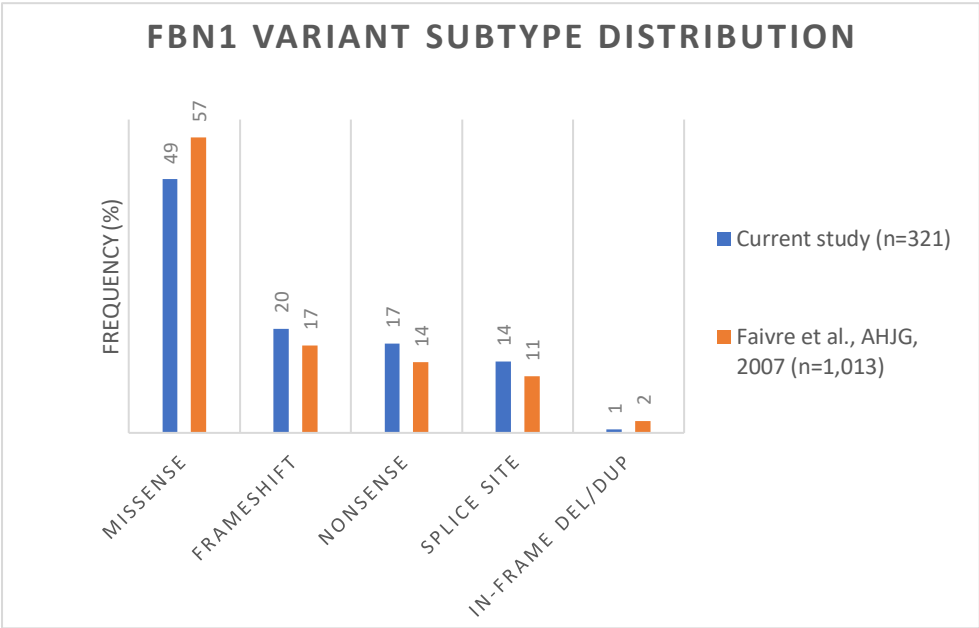

**Supplemental eFigure 1. Comparison of variant subtype distribution to literature.**

A comparison of the variant subtype distribution between our MFS cohort (n=321) and the study by Faivre *et al.*, AJHG, 2007.<sup>5</sup> del, deletion; dup, duplication.

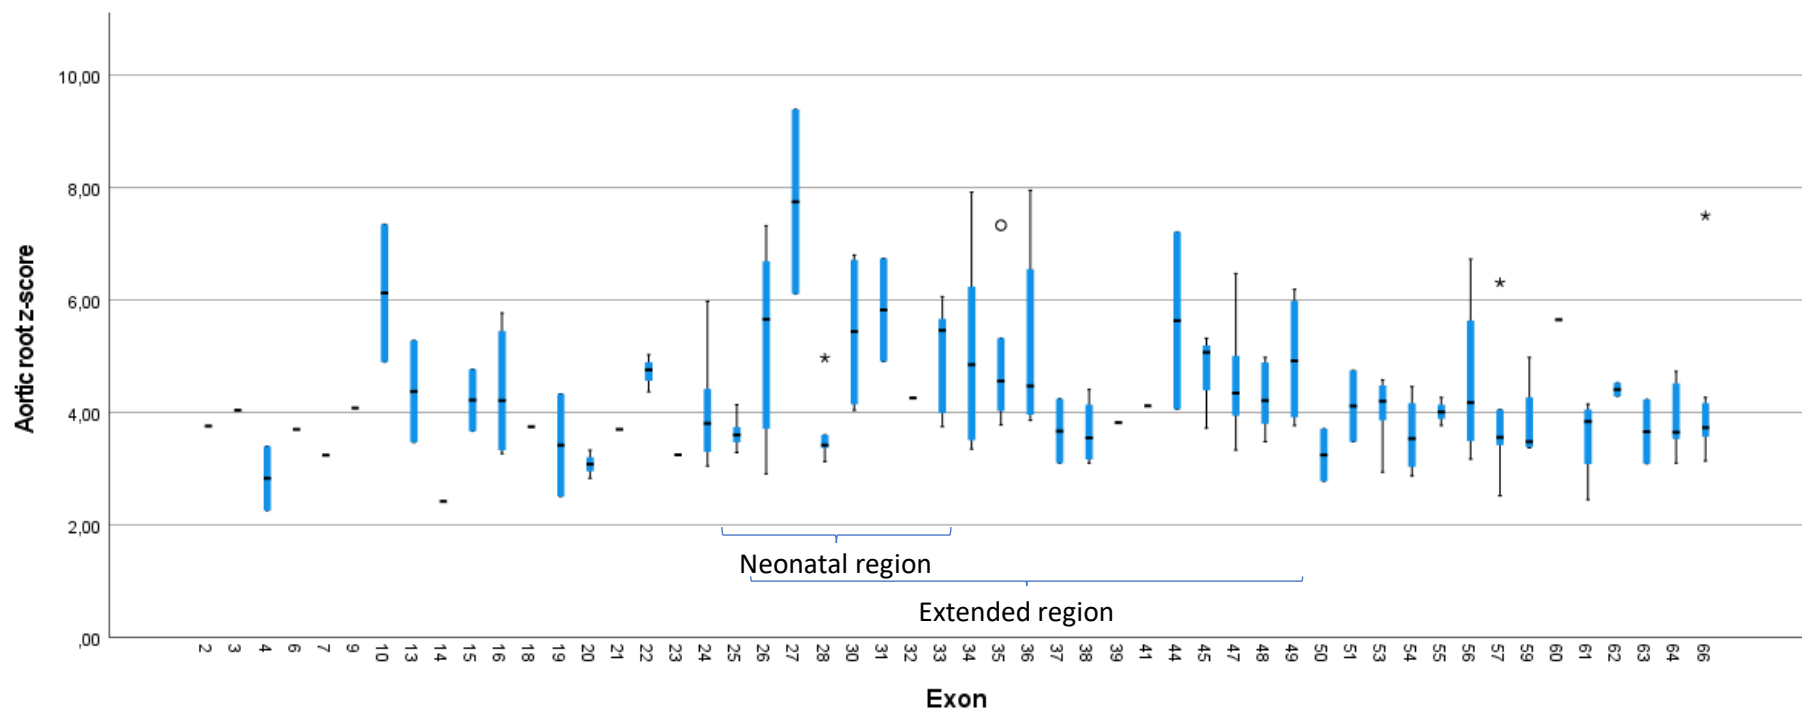

**Supplemental eFigure 2. Boxplots of aortic root z-score of patients with DN (likely) pathogenic variants according to exonic location.**

The thick line in the middle is the median. The blue boxes show the first and third quartiles. The whiskers show the maximum and minimum values, with the exceptions of outliers (circles) and extremes (asterisks).

## REFERENCES

1. Richards S, Aziz N, Bale S, et al. Standards and guidelines for the interpretation of sequence variants: a joint consensus recommendation of the American College of Medical Genetics and Genomics and the Association for Molecular Pathology. *Genet Med.* 2015;17(5):405-424.
2. Baetens M, Van Laer L, De Leeneer K, et al. Applying massive parallel sequencing to molecular diagnosis of Marfan and Loeys-Dietz syndromes. *Hum Mutat.* 2011.
3. Proost D, Vandeweyer G, Meester JA, et al. Performant Mutation Identification Using Targeted Next-Generation Sequencing of 14 Thoracic Aortic Aneurysm Genes. *Hum Mutat.* 2015;36(8):808-814.
4. Meester JA, Vandeweyer G, Pintelon I, et al. Loss-of-function mutations in the X-linked biglycan gene cause a severe syndromic form of thoracic aortic aneurysms and dissections. *Genet Med.* 2017;19(4):386-395.
5. Faivre L, Collod-Beroud G, Loeys BL, et al. Effect of mutation type and location on clinical outcome in 1,013 probands with Marfan syndrome or related phenotypes and FBN1 mutations: an international study. *Am J Hum Genet.* 2007;81(3):454-466.
